# Supplementary material for: Sirt1 is regulated by miR-135a and involved in DNA damage repair during mouse cellular reprogramming
Source: PubMed Central journal article supplement (PMC7202538; doi:10.18632/aging.103090), 2020-04-26
Supplement: aging-12-103090-s001..pdf [file aging-12-103090-s001..pdf]

**SUPPLEMENTARY FIGURES**

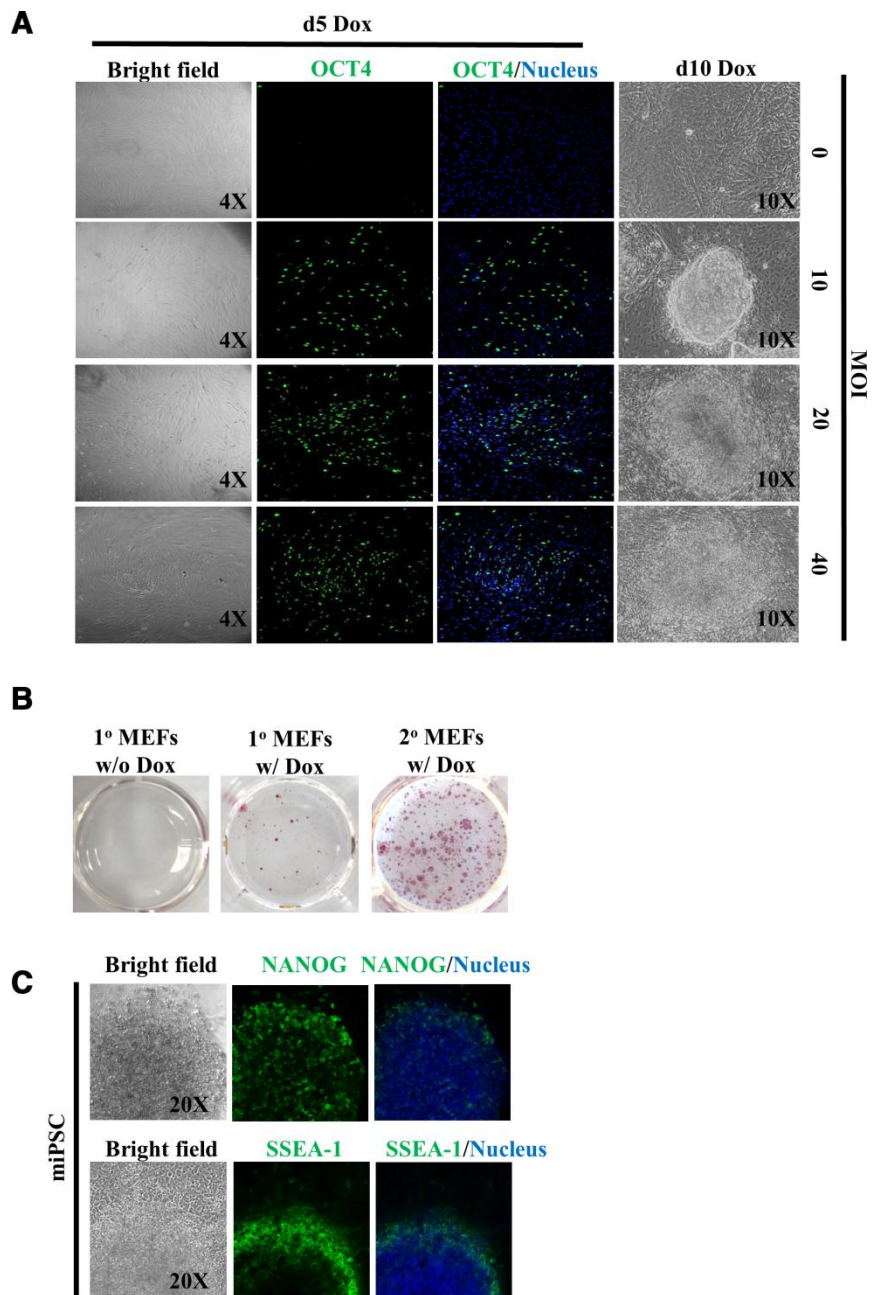

**Supplementary Figure 1. Establishment of 1° and 2° reprogramming systems from MEFs. (A)** Immunocytochemistry analysis of OCT4 (green) in 1° MEFs transduced with lentivirus at different multiplicity of induction (MOI). The nuclei were stained with DAPI (blue). **(B)** Alkaline phosphate staining on iPSC colonies formed after 15 days of DOX treatment in both 1° and 2° MEFs. **(C)** Immunocytochemistry analysis of NANOG and SSEA-1 in iPSC colonies formed from 1° MEFs after 15 days of DOX treatment.

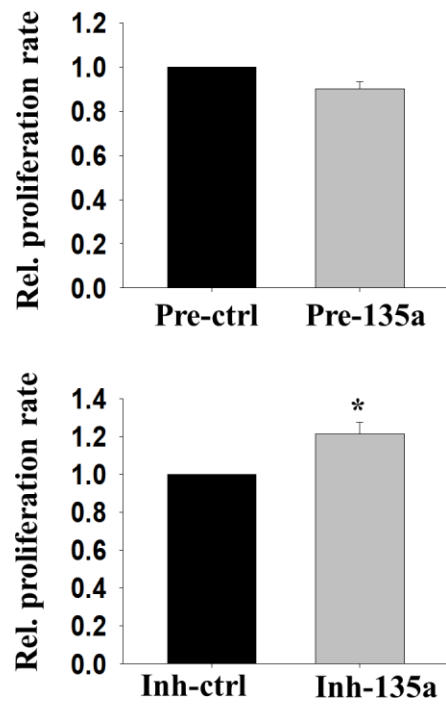

**Supplementary Figure 2. miR-135a affected proliferation rates of MEFs.** The relative proliferation rates of 1° MEFs after treatment with pre-135a or inh-135a for 24h (n=4; \*:p<0.05; t-test).

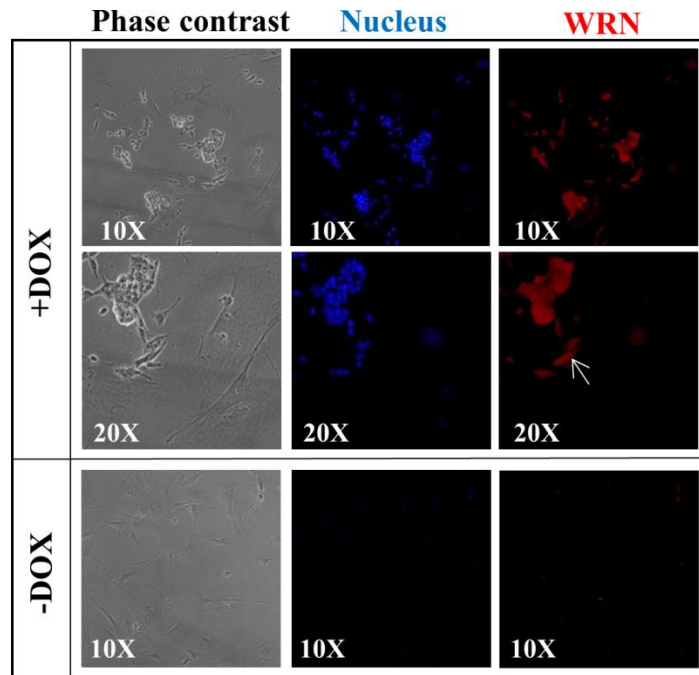

**Supplementary Figure 3. Expression of Wrn during reprogramming.** Immunocytochemistry analysis on WRN protein in 2° MEFs with (+DOX) or without (-DOX) DOX induction for 5 days. White arrow: reprogramming MEFs.
